1 **Pre-Pandemic COVID-19 in New York City: A descriptive analysis of**  
2 **COVID-19 illness prior to February 29, 2020**

3 **Page Keating, MSPH<sup>1</sup>, Jessica Sell, MPH<sup>1</sup>, Judy Chen<sup>1</sup>, Joel Ackelsberg MD, MPH<sup>1</sup>,**  
4 **Winfred Wu, MD<sup>1</sup>, Benjamin Tsoi, MD, MPH<sup>1</sup>, Don Weiss, MD, MPH<sup>1</sup>**

5 <sup>1</sup>New York City Department of Health and Mental Hygiene, Long Island City, Queens, New  
6 York, USA

7 *Corresponding author: Page Keating, pkeating1@health.nyc.gov*

8 Word count- 1828

9 **Key Points** (<40 words)

10 Records of 86 persons with confirmed COVID-19 and symptom onset prior to February 29, 2020  
11 were reviewed for likelihood of early onset COVID-19. Thirty-nine likely early onset COVID-19  
12 cases were identified, suggesting that early COVID-19 transmission in NYC went undetected.

13

14

15

16

17

18

19 **Abstract** (<250 words)

20 **Background:** On January 30, 2020 the COVID-19 pandemic was declared a Public Health  
21 Emergency of International Concern (PHEIC) by the World Health Organization. Almost a  
22 month later on February 29, 2020, the first case in New York City (NYC) was diagnosed.

23 **Methods:** Three-hundred-sixty persons with COVID-like illness was reported to the NYC  
24 Department of Health and Mental Hygiene (DOHMH) before February 29, but 37 of these tested  
25 negative and 237 were never tested for SARS-COV-2. Records of 86 persons with confirmed  
26 COVID-19 and symptom onset prior to February 29, 2020 were reviewed by four physician-  
27 epidemiologists. Case-patients were classified as likely early onset COVID-19, or insufficient  
28 evidence to determine onset. Clinical and epidemiological factors collected by DOHMH and  
29 supplemented with emergency department records were analyzed.

30 **Results:** Thirty-nine likely early onset COVID-19 cases were identified. The majority had severe  
31 disease with 69% presenting to an ED visit within 2 weeks of symptom onset. The first likely  
32 COVID-19 case on record had symptom onset on January 28, 2020. Only 7 of the 39 cases  
33 (18%) had traveled internationally within 14 days of onset (none to China).

34 **Conclusions:** SARS-CoV-2 and COVID-19 was in NYC before being classified as a PHEIC,  
35 and eluded surveillance for another month. The delay in recognition limited mitigation effort and  
36 by the time that city and state-wide mandates were enacted 16 and 22 days later there was  
37 already community transmission.

38 **Keywords:** COVID-19; COVID-19 Testing; New York City; surveillance; pandemic

39

## 40 **Background**

41 Severe acute respiratory syndrome coronavirus 2 (SARS-CoV-2), the virus that causes COVID-  
42 19, was declared a Public Health Emergency of International Concern by the World Health  
43 Organization (WHO) on January 30, 2020 (1). The first case of COVID-19 was diagnosed in  
44 New York City (NYC) on February 29, 2020 (2, 3). In January and most of February 2020,  
45 COVID-19 diagnostic testing was only available at the U.S. Centers for Disease Control and  
46 Prevention (CDC) and was restricted to patients with severe illness, known exposure, or travel  
47 history from affected areas (4). The exponential spread of COVID-19 in March 2020 prompted  
48 the NYC Department of Health and Mental Hygiene (DOHMH) to suspect that multiple  
49 introductions and sustained transmission had occurred in January and February of 2020 (2). In  
50 this report, we review medical and investigation records of case-patients with confirmed  
51 COVID-19 who reported symptom onset prior to February 29, 2020. The objective of this  
52 analysis was to identify COVID-19 cases that might have been diagnosed before February 29,  
53 2020, had sufficient diagnostic resources been available, to inform surveillance testing criteria in  
54 advance of the next pandemic.

## 55 **Methods**

56 NYC residents reported to the DOHMH with confirmed COVID-19 and symptom onset  
57 between January 1 and February 29, 2020 were eligible for the study. Symptom onset date was  
58 obtained through case investigations when providers contacted DOHMH seeking laboratory  
59 testing for suspect cases of COVID-19. COVID-19 was considered confirmed when case-  
60 patients either had a positive molecular SARS-CoV-2 laboratory report received electronically  
61 through the New York State Electronic Clinical Laboratory Reporting System (5), or for

62 deceased individuals had COVID-19 listed as a cause of death on the death certificate. Probable  
63 cases include those who tested positive for SARS-CoV-2 by antibody (one case-patient with  
64 MIS-C), or those who were symptomatic contacts of confirmed cases without laboratory  
65 confirmation of disease. Patient demographics, symptom information, comorbidities,  
66 epidemiological risk factors for COVID-19 exposure (i.e., travel history, known exposure, high-  
67 risk occupation<sup>\*</sup>), and illness severity indicators and outcomes (i.e., hospitalization, intensive  
68 care, death) were collected by DOHMH staff. Supplemental clinical information was collected  
69 from emergency department (ED) records.

70 Confirmed cases of COVID-19 with reported symptom onset between January 1 and February  
71 29, 2020 were reviewed by four COVID-19 response physician-epidemiologists. Case-patients  
72 were categorized as either likely to have had COVID-19 onset prior to February 29, 2020, or  
73 with insufficient evidence to determine early case infection status (prior to February 29, 2020).  
74 We considered initial symptoms; date of symptom onset; clinical findings on presentation to  
75 medical providers, if available; date of first positive molecular<sup>†</sup> SARS-CoV-2 test, and time  
76 lapse between symptom onset and diagnostic test. If symptoms occurred 21 days or less before  
77 the positive diagnostic test, this was considered suggestive of the onset date of COVID-19. If the  
78 physician-epidemiologists agreed independently with the infection status designation, case-  
79 patients were classified accordingly. All physician-epidemiologist discrepancies were  
80 adjudicated through deliberation amongst all four physician-epidemiologists. When consensus  
81 was not reached, case-patients were assigned to the “insufficient evidence” category.

---

<sup>\*</sup> High-risk occupations include those with frequent face-to-face contact with people, such as teachers, health care workers, construction workers, security workers, entertainment industry employees, clergy, conveyance drivers, and personal care services.

<sup>†</sup> One patient diagnosed with MIS-C was diagnosed by antigen

82 We describe case-patient demographics, epidemiological risk factors, and symptom-based  
83 classification meeting the COVID-19 Council for State and Territorial Epidemiologists (CSTE)  
84 case definition for COVID-19-like-illness (CLI)(6). Analyses were conducted using SAS  
85 software (version 9.4; SAS Institute) and R (version 3.6.3; The R Foundation).

## 86 **Results**

87 We identified 360 individuals who were reported to the DOHMH before February 29, 2020 with  
88 CLI. Thirty-seven case-patients tested negative for SARS-CoV-2 and 237 were never tested. The  
89 remaining 86 were designated for physician-epidemiologist review; 39 (45%) were categorized  
90 as likely having had COVID-19 with onset prior to Feb 29, 2020, with the remainder (n=47)  
91 having insufficient evidence to confirm early case infection status (Figure 1). The case-patients  
92 with likely early onset COVID-19 (n=39) had a median age of 52 years (IQR 39-64). Most  
93 (56%) were male and resided in Brooklyn (33%), Manhattan (23%), Queens (21%), Bronx  
94 (18%), and Staten Island (5%). Thirty-three percent were White, 15% Black, and 33.3%  
95 Hispanic. Twenty-three percent worked in high-risk occupations and 18% reported international  
96 travel in the two weeks prior to onset, though none from China (Table 1).

97 Illness onset for the earliest likely COVID-19 case-patient was January 28, 2020, and most  
98 (69/86, 80%) who met review criteria had onset in the last 2 weeks of February (Figure 2).

99 Common symptoms reported by case-patients were fever (92%), cough (89%), shortness of  
100 breath (57%), myalgia (46%) and chills (41%). Twenty-seven (69%) of the patients had either  
101 pneumonia (19 case-patients) or acute respiratory disease syndrome (ARDS, 8 case-patients)  
102 (Table 1). Nearly all likely early onset case-patients met the CSTE definition for CLI (95%,  
103 Table 1). Approximately half (49%) presented with CLI to an NYC ED within two weeks of

104 symptom onset. The average number of days between symptom onset and diagnosis date was 16  
105 days (IQR: 10-28) for likely early onset COVID-19 case-patients and 54 days (IQR: 35-86) for  
106 those with insufficient evidence to characterize COVID-19 status. The average number of days  
107 between diagnosis and ED visit was 17.5 days (IQR: 0-29) and 35 days (IQR: 0-66), respectively  
108 for likely COVID-19 cases and for those with insufficient evidence to characterize.  
109 Additionally, case-patients for whom there was insufficient evidence to verify their onset date  
110 more often were women, Black or Hispanic, resided in the Bronx or Queens, and had not  
111 traveled or worked in a high-risk occupation.

## 112 **Discussion**

113 This analysis expands upon a previous DOHMH report and provides insight into the timing of  
114 NYC's first COVID-19 wave, which caused over 200,000 cases and 18,000 deaths (2). The  
115 demographic characteristics of the likely early onset COVID-19 cases mirror those of the NYC  
116 population as does the distribution of cases across the five boroughs. A total of 360 individuals  
117 were reported to DOHMH with COVID-19-like symptoms, and the earliest case-patient with  
118 likely SARS-CoV-2 infection had onset on January 28, 2020. This person had not traveled and  
119 worked in a high-risk occupation. While our retrospective analysis identified 39 likely cases of  
120 COVID-19 prior to February 29, there undoubtedly were many more undetected COVID-19  
121 cases in NYC. Only the most severely ill suspected COVID-19 cases, as reflected by the 69%  
122 with either pneumonia or ARDS, were tested with the newly available diagnostic test. Of the 360  
123 individuals reported to DOHMH during the time period, 237 were not tested.

124 These findings illustrate that community transmission was occurring at least a month prior to  
125 recognition of the first case and indicate that the surveillance strategy was inadequate.

126 Supporting evidence for this conclusion comes from a NYC hospital network that tested stored

127 respiratory specimens for SARS-CoV-2 and demonstrated that the virus was likely circulating in  
128 late January 2020 or possibly earlier (7, 8).

129 The shortage of SARS-CoV-2 diagnostic laboratory supplies early in the pandemic hindered  
130 surveillance efforts. CDC's criteria limited testing to persons who had evidence of lower  
131 respiratory illness and travel to Wuhan City, China (9). Since a small proportion of COVID-19  
132 cases would have resulted in hospitalization, most would not have met criteria and been  
133 undetected (10). We, and other cities, endeavored in February 2020 to collect, and CDC agreed  
134 to test, pooled influenza negative specimens from emergency department visits in order to  
135 determine whether SARS-CoV-2 was circulating in NYC; however, we were unable to begin  
136 specimen collection until early March 2020 (11, 12).

137 Investments to improve federal capacity to quickly manufacture and distribute diagnostic test kits  
138 are a priority, but we contend that the approach to pre-pandemic surveillance also needs to be  
139 reconsidered. When a pandemic virus emerges, public health creates a surveillance case  
140 definition to identify suspect cases for investigation. Case definitions are often crafted to identify  
141 patients with severe disease because they are most likely to come to medical attention.

142 Conventional public health wisdom has been to assume that initial cases will have traveled from  
143 the geographic area of origin. However, if mild, non-specific disease predominates, and the virus  
144 spreads quickly, as occurred with SARS-CoV-2, a surveillance strategy of severe illness in  
145 travelers will likely miss the early introduction. Surveillance criteria should be broadened based  
146 on available epidemiology data to detect the entire spectrum of disease of a novel virus's entry  
147 into a population. Although the preliminary epidemiology data from China was sparse, a  
148 respiratory pathogen with person-to-person transmission would be expected to affect individuals  
149 with frequent face-to-face contact with others, especially contact with persons reporting recent

150 travel. With the ease and speed of international travel areas of the world other than the initial  
151 outbreak zone should be included in surveillance criteria. The importation of SARS-CoV-2 into  
152 NYC has been linked to strains circulating in European countries (7).

153 If, or perhaps when, another novel virus emerges there again may be periods of limited testing  
154 capacity. When distributing a limited resource, such as diagnostic testing, consideration must  
155 also be given to vulnerable populations and those who historically have had inadequate access to  
156 care (13). Additionally, provisions should be made for pre-designated sentinel sites to collect  
157 specimens for pooled testing or appropriately stored for later analysis. Wastewater surveillance  
158 holds promise of early pandemic awareness if it can reliably detect and identify sequences of  
159 both known and novel pathogens (14).

160 Our review was limited by recall bias. Case-patients reviewed were often tested, interviewed, or  
161 went to the ED weeks after their symptom onset. Therefore, we adopted a conservative approach  
162 to classification, requiring verification of onset dates by medical or hospitalization records, to  
163 strengthen the plausibility of a single, continuous illness between symptom onset and diagnosis.  
164 All those classified as early COVID-19 cases were diagnosed with a molecular SARS-CoV-2  
165 test. Although the blueprint for diagnostic tests for SARS-CoV-2 was published by WHO within  
166 a month of the sequence publication (15), it took another month for the CDC to release its  
167 diagnostic test (10). Even by the end of February testing availability was limited, hence our study  
168 could not capture individuals who were symptomatic and either never tested or tested negative  
169 after viral clearance.

170 NYC closed schools on March 16, 2020 and implemented “Pause,” the closure of all non-  
171 essential business in New York State, on March 22, 2020. Whether the knowledge that SARS-  
172 CoV-2 was circulating in NYC in late January would have prompted an earlier response is



173 speculative, however, by the time authorities implemented population-based control measures  
174 community transmission of COVID-19 was already widespread. And while we cannot be certain  
175 when the first COVID-19 case occurred in NYC, or how many introductions propelled the first  
176 NYC wave, the delay in recognition limited the effectiveness of mitigation efforts. Our study  
177 adds to the body of evidence that pandemics can grow quickly and undetected, and that our  
178 ability to identify early introductions is paramount to the control efforts (7, 8). There is little  
179 doubt that community transmission of SARS-CoV-2 accelerated quietly and rapidly in NYC  
180 without detection before the pandemic's arrival was announced officially on February 29, 2020.

181

## 182 **Funding**

183 This work was supported by the Centers for Disease Control and Prevention (CDC)  
184 Epidemiology and Laboratory Capacity Grant [grant number 6 NU50CK000517-02].

## 185 **Conflicts of Interest**

186 None of the authors of this manuscript had conflict of interests.

## 187 **Acknowledgments**

188 Marcelle Layton, Incident Command System Surveillance and Epidemiology Section, New York  
189 City Department of Health and Mental Hygiene

## 190 References

- 191 1. (WHO) WHO. Statement on the second meeting of the International Health Regulations (2005)  
192 Emergency Committee regarding the outbreak of novel coronavirus (2019-nCoV).  
193 [https://www.who.int/news/item/30-01-2020-statement-on-the-second-meeting-of-the-international-](https://www.who.int/news/item/30-01-2020-statement-on-the-second-meeting-of-the-international-health-regulations-(2005)-emergency-committee-regarding-the-outbreak-of-novel-coronavirus-(2019-ncov))  
194 [health-regulations-\(2005\)-emergency-committee-regarding-the-outbreak-of-novel-coronavirus-\(2019-](https://www.who.int/news/item/30-01-2020-statement-on-the-second-meeting-of-the-international-health-regulations-(2005)-emergency-committee-regarding-the-outbreak-of-novel-coronavirus-(2019-ncov))  
195 [ncov\)](https://www.who.int/news/item/30-01-2020-statement-on-the-second-meeting-of-the-international-health-regulations-(2005)-emergency-committee-regarding-the-outbreak-of-novel-coronavirus-(2019-ncov)); WHO; 2020.
- 196 2. Thompson CN, Baumgartner J, Pichardo C, Toro B, Li L, Arciuolo R, et al. COVID-19 Outbreak -  
197 New York City, February 29-June 1, 2020. *MMWR Morb Mortal Wkly Rep.* 2020; 69:1725-9.
- 198 3. Cuomo A. Governor Cuomo Issues Statement Regarding Novel Coronavirus in New York. This  
199 evening we learned of the first positive case of novel coronavirus.  
200 [https://www.governor.ny.gov/news/governor-cuomo-issues-statement-regarding-novel-coronavirus-](https://www.governor.ny.gov/news/governor-cuomo-issues-statement-regarding-novel-coronavirus-new-york)  
201 [new-york](https://www.governor.ny.gov/news/governor-cuomo-issues-statement-regarding-novel-coronavirus-new-york); New York State; 2020.
- 202 4. Prevention CfDca. Update and Interim Guidance on Outbreak of 2019 Novel Coronavirus (2019-  
203 nCoV). In: Response CfPa, editor.: CDC Health Alert Network (HAN); 2020.
- 204 5. Health NYSDo. Electronic Clinical Laboratory Reporting System. Website for the State of New  
205 York: Department of Health; 2011 [cited 2021 September 20]; Available from:  
206 [https://www.health.ny.gov/professionals/reportable\\_diseases/eclrs/](https://www.health.ny.gov/professionals/reportable_diseases/eclrs/).
- 207 6. Epidemiologists CoSaT. Update to the standardized surveillance case definition and national  
208 notification for 2019 novel coronavirus disease (COVID-19). Committee: Infectious Disease. CSTE  
209 Position Statement Archive Online: <https://www.cste.org/page/PositionStatements>; 2021. p. 22.
- 210 7. Hernandez MM, Gonzalez-Reiche AS, Alshammary H, Fabre S, Khan Z, van De Guchte A, et al.  
211 Molecular evidence of SARS-CoV-2 in New York before the first pandemic wave. *Nature*  
212 *Communications.* 2021; 12:3463.
- 213 8. Althoff KN, Schlueter DJ, Anton-Culver H, Cherry J, Denny JC, Thomsen I, et al. Antibodies to  
214 Severe Acute Respiratory Syndrome Coronavirus 2 (SARS-CoV-2) in All of Us Research Program  
215 Participants, 2 January to 18 March 2020. *Clinical Infectious Diseases.* 2021.
- 216 9. Patel A, Jernigan DB, nCoV VDCRRT. Initial Public Health Response and Interim Clinical Guidance  
217 for the 2019 Novel Coronavirus Outbreak - United States, December 31, 2019-February 4, 2020. *MMWR*  
218 *Morb Mortal Wkly Rep.* 2020; 69:140-6.
- 219 10. Reese H, Iuliano AD, Patel NN, Garg S, Kim L, Silk BJ, et al. Estimated Incidence of Coronavirus  
220 Disease 2019 (COVID-19) Illness and Hospitalization-United States, February-September 2020. *Clin Infect*  
221 *Dis.* 2021; 72:e1010-e7.
- 222 11. Bushman D, Alroy KA, Greene SK, Keating P, Wahnich A, Weiss D, et al. Detection and Genetic  
223 Characterization of Community-Based SARS-CoV-2 Infections - New York City, March 2020. *MMWR*  
224 *Morb Mortal Wkly Rep.* 2020; 69:918-22.
- 225 12. Spellberg B, Haddix M, Lee R, Butler-Wu S, Holtom P, Yee H, et al. Community Prevalence of  
226 SARS-CoV-2 Among Patients With Influenzalike Illnesses Presenting to a Los Angeles Medical Center in  
227 March 2020. *JAMA.* 2020.
- 228 13. Lieberman-Cribbin W, Alpert N, Flores R, Taioli E. Analyzing disparities in COVID-19 testing  
229 trends according to risk for COVID-19 severity across New York City. *BMC Public Health.* 2021; 21:1717.
- 230 14. Kirby AE, Walters MS, Jennings WC, Fugitt R, LaCross N, Mattioli M, et al. Using Wastewater  
231 Surveillance Data to Support the COVID-19 Response - United States, 2020-2021. *MMWR Morb Mortal*  
232 *Wkly Rep.* 2021; 70:1242-4.
- 233 15. DZIF. Researchers develop first diagnostic test for novel coronavirus in China- January 16 2020.  
234 In: Drosten C, editor. [https://www.dzif.de/en/researchers-develop-first-diagnostic-test-novel-](https://www.dzif.de/en/researchers-develop-first-diagnostic-test-novel-coronavirus-china)  
235 [coronavirus-china](https://www.dzif.de/en/researchers-develop-first-diagnostic-test-novel-coronavirus-china); DZIF; 2020.

236

237 **Table:** Demographics and clinical information for likely cases of COVID-19 and case-patients  
 238 with insufficient evidence to determine COVID-19 status.

|                                                               | <b>Likely Case of Early Onset COVID-19</b> | <b>Insufficient Evidence to Determine</b> |
|---------------------------------------------------------------|--------------------------------------------|-------------------------------------------|
| <b>N (%)</b>                                                  | 39 (45%)                                   | 47 (55%)                                  |
| Died                                                          | 13 (15%)                                   | 19 (22%)                                  |
| <b>Age (median, IQR<sup>±</sup>)</b>                          | 52 (39 – 64)                               | 58 (45 – 63.5)                            |
| <b>Gender</b>                                                 |                                            |                                           |
| Male                                                          | 22 (56%)                                   | 20 (43%)                                  |
| Female                                                        | 16 (41%)                                   | 27 (57%)                                  |
| Transgender                                                   | 1 (3%)                                     | 0 (0%)                                    |
| <b>Race / Ethnicity</b>                                       |                                            |                                           |
| Asian                                                         | 5 (13%)                                    | 2 (4%)                                    |
| Black / African American                                      | 6 (15%)                                    | 11 (23%)                                  |
| Hispanic / Latino                                             | 13 (33%)                                   | 24 (51%)                                  |
| White                                                         | 13 (33%)                                   | 8 (17%)                                   |
| Other                                                         | 0 (0%)                                     | 1 (1%)                                    |
| Unknown                                                       | 2 (5%)                                     | 1 (1%)                                    |
| <b>Borough</b>                                                |                                            |                                           |
| Bronx                                                         | 7 (18%)                                    | 12 (26%)                                  |
| Brooklyn                                                      | 13 (33%)                                   | 16 (34%)                                  |
| Manhattan                                                     | 9 (23%)                                    | 4 (8%)                                    |
| Queens                                                        | 8 (21%)                                    | 14 (30%)                                  |
| Staten Island                                                 | 2 (5%)                                     | 1 (2%)                                    |
| <b>Met the CSTE<sup>‡</sup> definition of CLI<sup>§</sup></b> |                                            |                                           |
| Fever                                                         | 34 (92%)                                   | 29 (69%)                                  |
| Cough                                                         | 33 (89%)                                   | 26 (62%)                                  |
| Shortness of breath                                           | 21 (57%)                                   | 24 (57%)                                  |
| Myalgia                                                       | 17 (46%)                                   | 16 (38%)                                  |
| Chills                                                        | 15 (41%)                                   | 16 (38%)                                  |
| Loss of taste or smell                                        | 1 (3%)                                     | 7 (17%)                                   |
| Congestion or runny nose                                      | 8 (22%)                                    | 5 (12%)                                   |
| Diarrhea                                                      | 15 (41%)                                   | 8 (19%)                                   |
| Nausea or vomiting                                            | 2 (5%)                                     | 5 (12%)                                   |

|                                                             |            |            |
|-------------------------------------------------------------|------------|------------|
| <b>Clinical Indications</b>                                 |            |            |
| Acute Respiratory Distress Syndrome                         | 8 (21%)    | 4 (9%)     |
| Pneumonia                                                   | 19 (49%)   | 11 (23%)   |
| <b>ED<sup>□</sup> Visit within 2 weeks of symptom onset</b> | 27 (69%)   | 15 (32%)   |
| Presented with CLI                                          | 19 (49%)   | 5 (11%)    |
| <b>Other Risk Factors</b>                                   |            |            |
| Travel outside of country ≤14 days of onset                 | 7 (18%)    | 1 (2%)     |
| High-risk occupation                                        | 9 (23%)    | 4 (9%)     |
| <b>Days between Onset and Diagnosis Date</b>                |            |            |
| Median days (IQR)                                           | 16 (10-28) | 54 (35-86) |

239

240 <sup>±</sup> Interquartile range

241 <sup>≠</sup> Council of State and Territorial Epidemiologists

242 <sup>§</sup> COVID-19-like illness

243 <sup>□</sup> Emergency department

244

245

246

247

248

249

250

251

252 **Figure 1:** Case classification for Medical Epidemiological Review

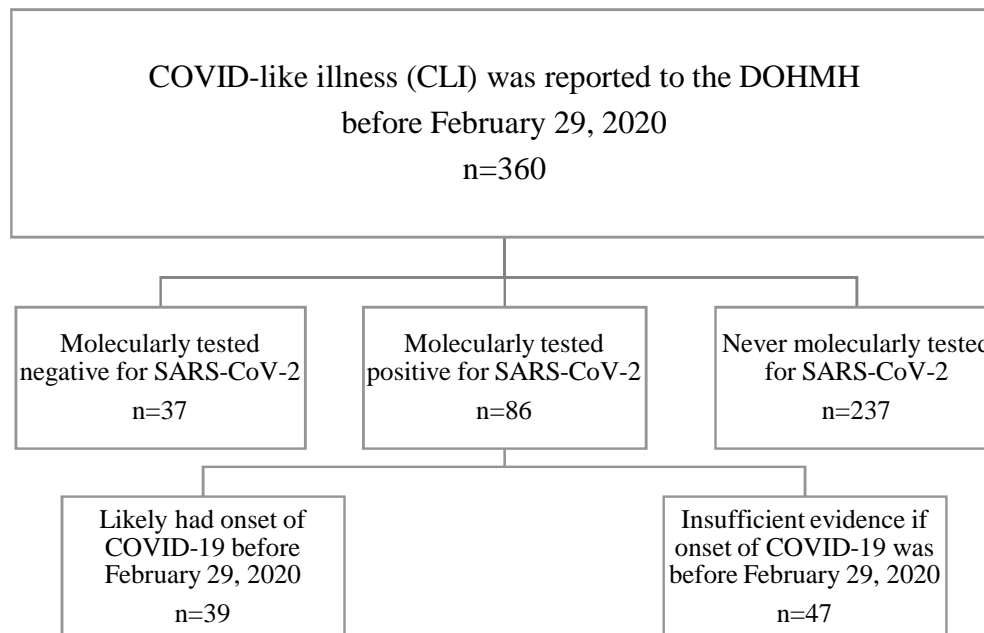

253

254

255

256

257

258

259

260

261

262

263 **Figure 2:** Suspected early onset cases of COVID-19 by symptom onset date and early onset case  
264 classification (likely early onset vs insufficient evidence).

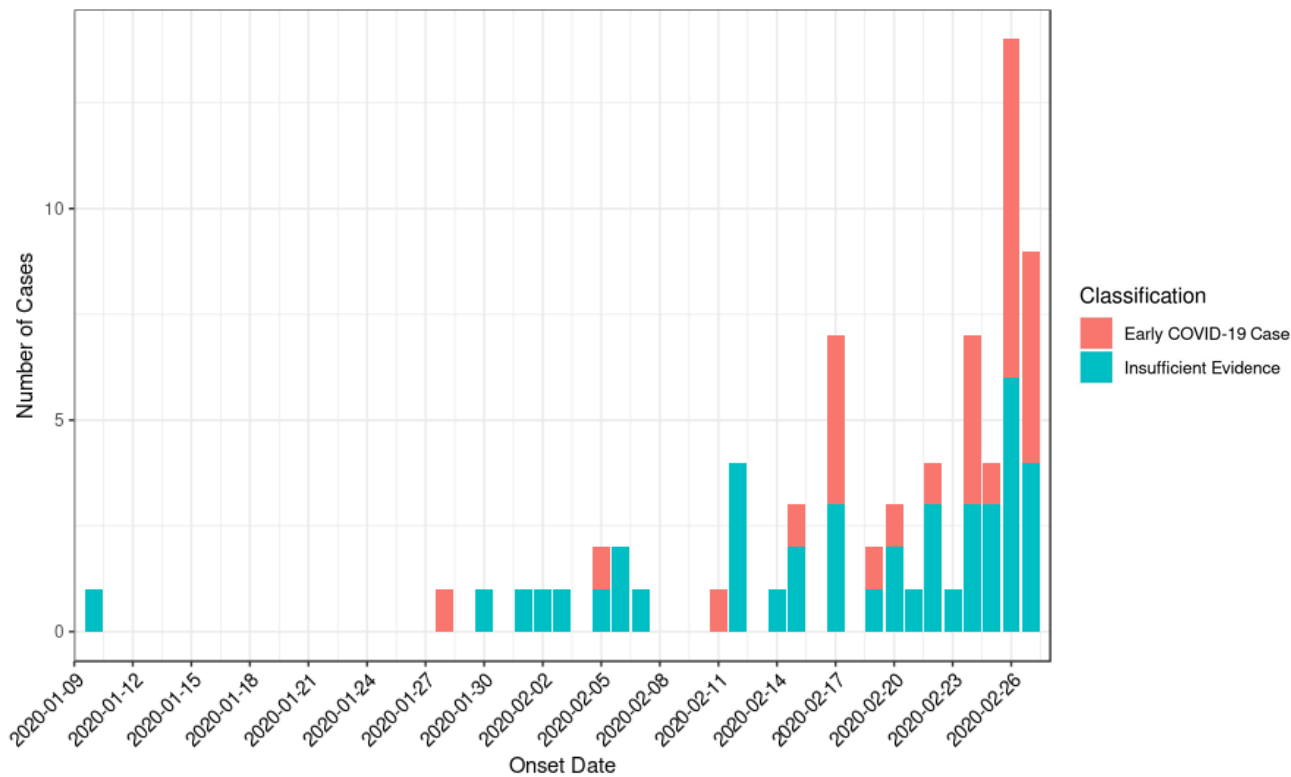

265
